# Supplementary material
Source: Springer Nature journal article supplement (https://www.springermedizin.de/resource/supplementary/12936_2007_379_MOESM4_ESM.pdf/9547676)
Supplement: MOESM4 [file 9547676]

## **Positive aspects:**

- *“It is rapid and easy to use and it can enable treatment and can prevent complication.”*
- *“Test is easy to use a nurse can make a diagnosis without involving the doctor and treat the patient”.*
- *“The community is aware that such a test exists, they come to clinic and ask for a malaria test.”*
- *“We can do the test at the clinic no need to go to the hospital.”*
- *“I can praise it because it can save someone’s life.”*
